# Supplementary material for: The impact of agriculture on tropical mountain soils in the western Peruvian Andes: a pedo-geoarchaeological study of terrace agricultural systems in the Laramate region (14.5° S)
Source: Copernicus journal article supplement (doi:10.5194/egusphere-2024-637), 2024-03-12
Supplement: Supplementary file [file egusphere-2024-637-AC2-supplement.pdf]

## Remarks Anonymous Referee #2

**R2.1:** A lot of thanks for such interesting and important article. I have only several technical notes.

**A2.1:** Thank you for reviewing our article, for your comments and for the opportunity to clarify any ambiguities.

**R2.2:** There is no explanation for photo 7 in Figure 6.

**A2.2:** You are absolutely right, and we apologize for this mistake. Figure 6 (f) and now 6 (g) show the same starch grain under different lighting conditions: (f) under plane-polarized light and (g) under cross-polarized light. We will include this information in the manuscript.

**R2.3:** You cannot use two nomenclatures of phytoliths. You should only use the latest one - for 2019. All names of phytolith morphotypes must be given according to the nomenclature for 2019. The names of phytolith morphotypes should be written in small capital letters and not in italics.

**A2.3:** We appreciate your feedback. We will revise the nomenclature of phytolith morphotypes according to Neumann et al. (2019) and use capital letters in the text and figures.

### References:

Neumann, K., Strömberg, C. A. E., Ball, T., Albert, R. M., Vrydaghs, L., and Cummings, L. S.: International Code for Phytolith Nomenclature (ICPN) 2.0, Ann Bot, 124, 189–199, <https://doi.org/10.1093/aob/mcz064>, 2019.
